# Supplementary material for: Metal–metal cooperative bond activation by heterobimetallic alkyl, aryl, and acetylide Pt II /Cu I complexes
Source: Royal Society of Chemistry journal article supplement (doi:10.1039/d0sc00646g), 2020-01-01
Supplement: d0sc00646g1.zip [file d0sc00646g1.zip]

## Sheet: Reaction Profile
						Click on hyperlinks for MOL2 structures
				SUM (Hartree)	REL (kcal/mol)	Complex	Organics
Starting Complex + Propyne	Starting Complex [3'] + Propyne	-3172.21	-116.514	-3288.73	0	3p.mol2	Propyne.mol2
Coordination of Alkyne	Propyne Coordinated Complex [A]	-3288.71		-3288.71	12.9962	A.mol2
	Propyne Coordinated Complex, Isomer [A']	-3288.7		-3288.7	14.7538	Ap.mol2
Oxidative Addition of the Alkyne C-H pair to the PtII-center	TS for Oxidative Addition of Alkyne C-H to Pt(II) [TS_AB']	-3288.66		-3288.66	42.995	TS_ABp.mol2
	TS for Oxidative Addition of Alkyne C-H to Pt(II) [TS_AB]	-3288.69		-3288.69	24.4392	TS_AB.mol2
Pt-H complexes formed after Oxidative Addition	Pt-H complex [B']	-3288.7		-3288.7	14.6848	Bp.mol2
	Pt-H complex [B]	-3288.71		-3288.71	12.6573	B.mol2
Methane Reductive Elimination	TS for Reductive Elimination [TSBC]	-3288.7		-3288.7	18.7491	TS_BC.mol2
Direct Protonation	TS for direct protonolysis of Pt-CH3 [TSAC]	-3288.66		-3288.66	38.6904	TS_AC.mol2
Final Complex	Final Complex [C] + Methane	-3248.32	-40.4467	-3288.77	-28.4716	C.mol2	Methane.mol2
